# Supplementary material for: CEP128 is involved in spermatogenesis in humans and mice
Source: PubMed Central journal article supplement (PMC8927350; doi:10.1038/s41467-022-29109-7), 2022-03-16
Supplement: 41467_2022_29109_MOESM1_ESM.pdf [file 41467_2022_29109_MOESM1_ESM.pdf]

# **CEP128 is involved in spermatogenesis in humans and mice**

Xueguang Zhang *et al.*

## Supplementary Information

### Supplementary Fig. 1

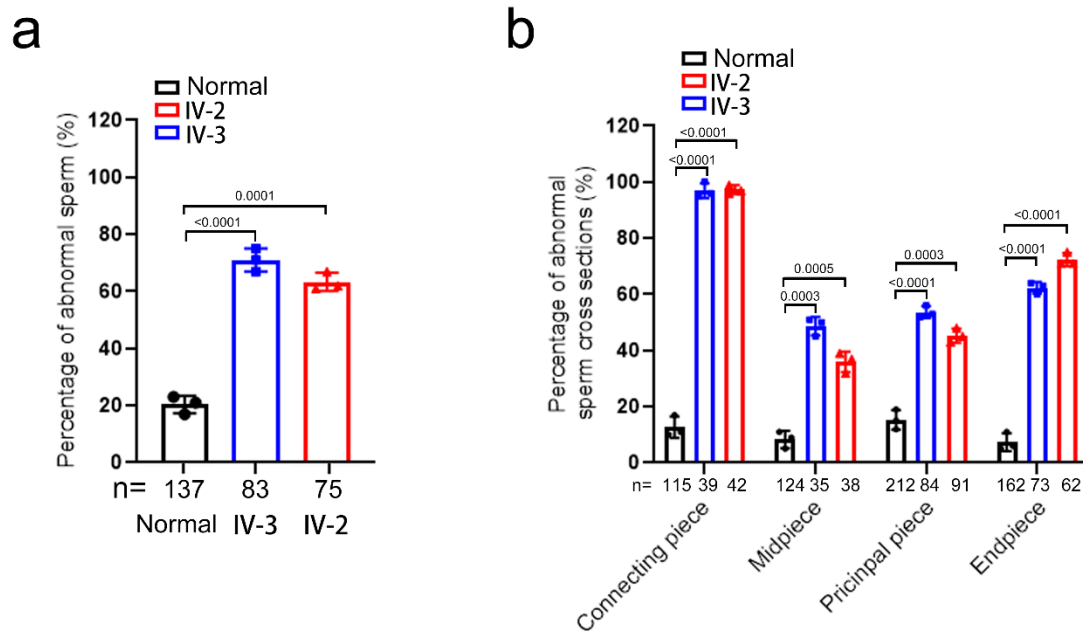

### Supplementary Fig. 1 Statistics describing the abnormal phenotype of

**spermatozoa in the two patients. a** Statistics on aberrant sperm in control and patients.

Three independent experiments were performed. n, the number of spermatozoa analyzed. (Two-sided student's *t* test; error bars, mean  $\pm$  SEM). The *p* values are indicated in the graphs.

**b** Statistics on abnormal sperm ultrastructure in control and

patients. n, the number of cross sections analyzed. Three independent experiments were performed. (Two-sided student's *t* test; error bars, mean  $\pm$  SEM). The *p* values are

indicated in the graphs. Source data are provided as a Source Data file.

## Supplementary Fig. 2

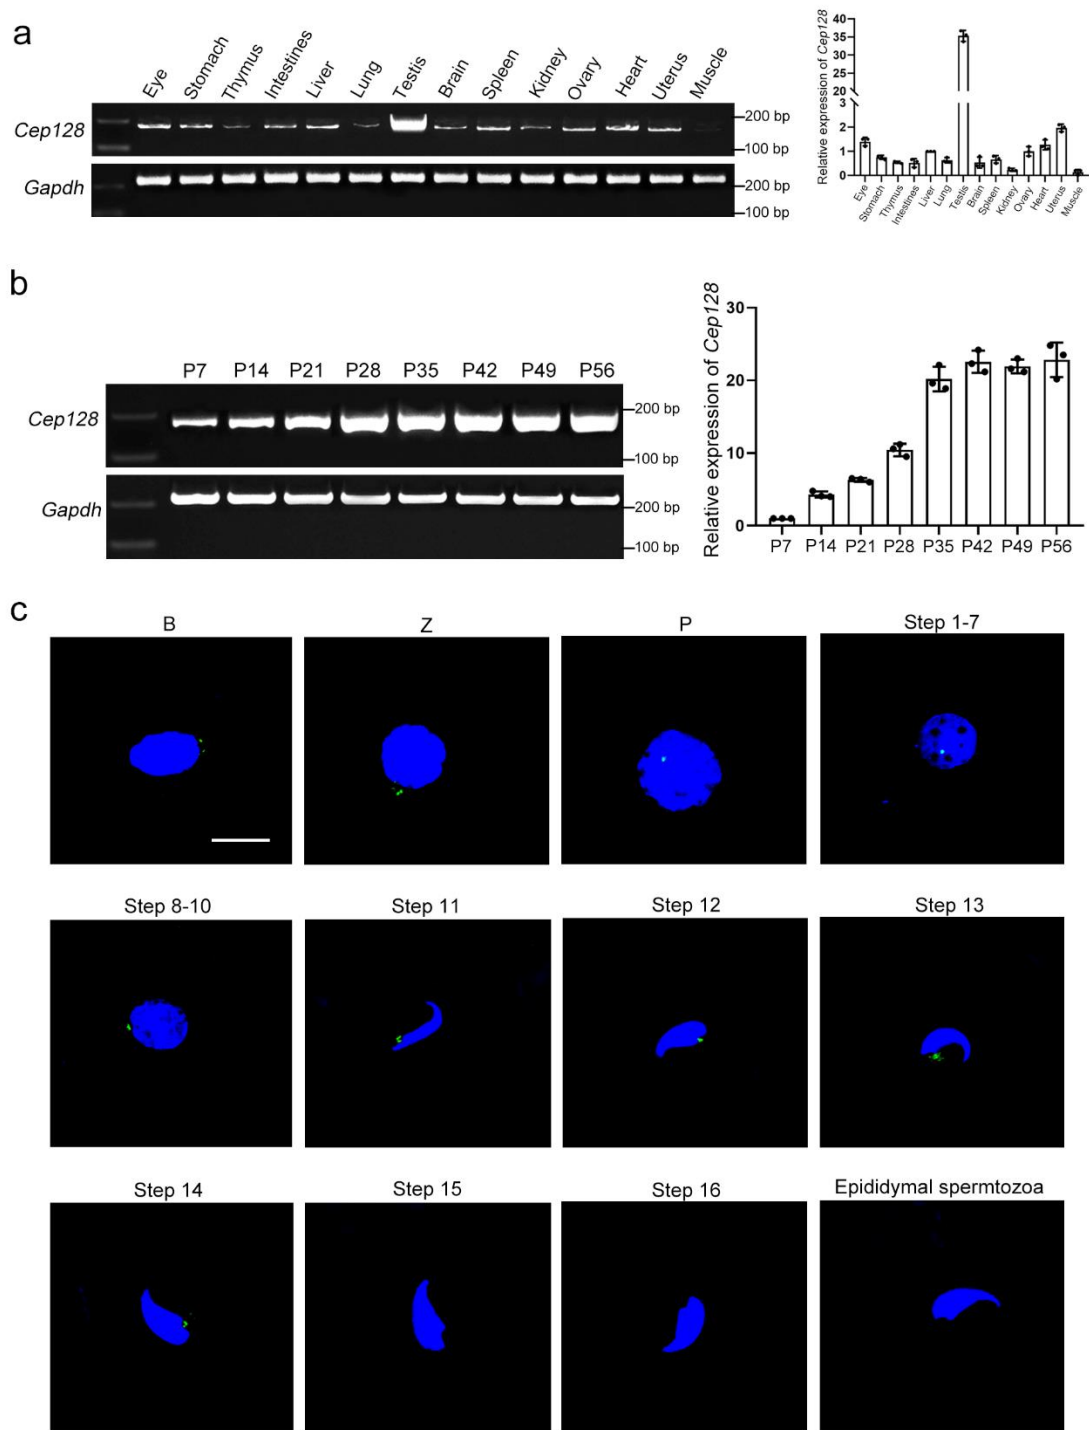

**Supplementary Fig. 2 Expression and location of CEP128/*Cep128* in the testis. a** qPCR analysis of *Cep128* mRNA expression in various tissues from adult male mice. (n = 3 biologically independent WT mice; error bars, mean  $\pm$  SEM). **b** *Cep128* expression in mouse testes on various postnatal days. **c** *Cep128* was expressed in the

centrioles of B spermatogonia (B), zygotene spermatocytes (Z), pachytene spermatocytes (P), round spermatids (steps 1–7), and elongating/elongated spermatids (steps 8–14); but CEP128 was absent in steps 15–16 spermatids and epididymal spermatozoa. (n = 3 biologically independent WT mice for each age; error bars, mean  $\pm$  SEM; green, CEP128; blue, DAPI; scale bars, 5  $\mu$ m). Source data are provided as a Source Data file.

### Supplementary Fig. 3

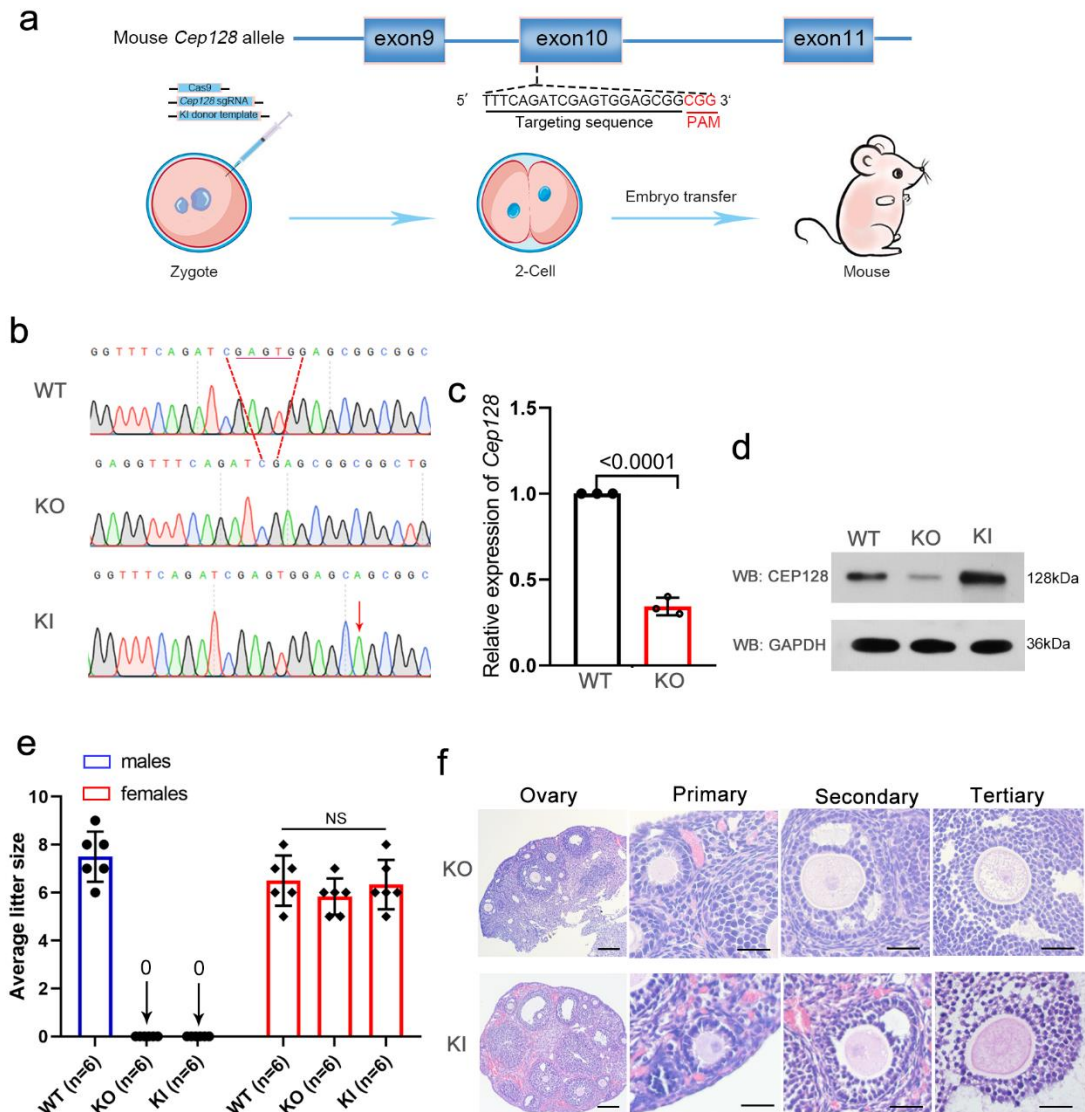

**Supplementary Fig. 3 Construction of *Cep128* KO and KI mice.** **a** Schematic illustration of the targeting strategy for generating *Cep128* KO and KI mice. **b** Results of PCR-seq genotyping using tail DNA from KO and KI mice. The red line designates the deleted bases in KO mice, and the red arrow denotes the point variant in KI mice. **c** qPCR showed that *Cep128* was significantly reduced in testes from KO mice. (n = 3 biologically independent WT mice or KO mice; two-sided student's *t* test; error bars, mean ± SEM). The *p* values are indicated in the graphs. **d** Western blots showing that

CEP128 expression was decreased in the testicular tissues of homozygous KO male mice and increased in homozygous KI mice. (n = 3 biologically independent WT mice, KI mice or KO mice). **e** Fertility in WT, KO, and KI mice. KO and KI males were completely sterile, while females showed normal fertility. n, the number of mice analyzed. (Two-sided student's *t* test; NS, not significant; error bars, mean  $\pm$  SEM). **f** Dysfunction of *Cep128* exhibited null effects on oocyte development in homozygous KO and KI females (n = 3 biologically independent KO female mice or KI female mice; scale bars, 50  $\mu$ m). Source data are provided as a Source Data file.

## Supplementary Fig. 4

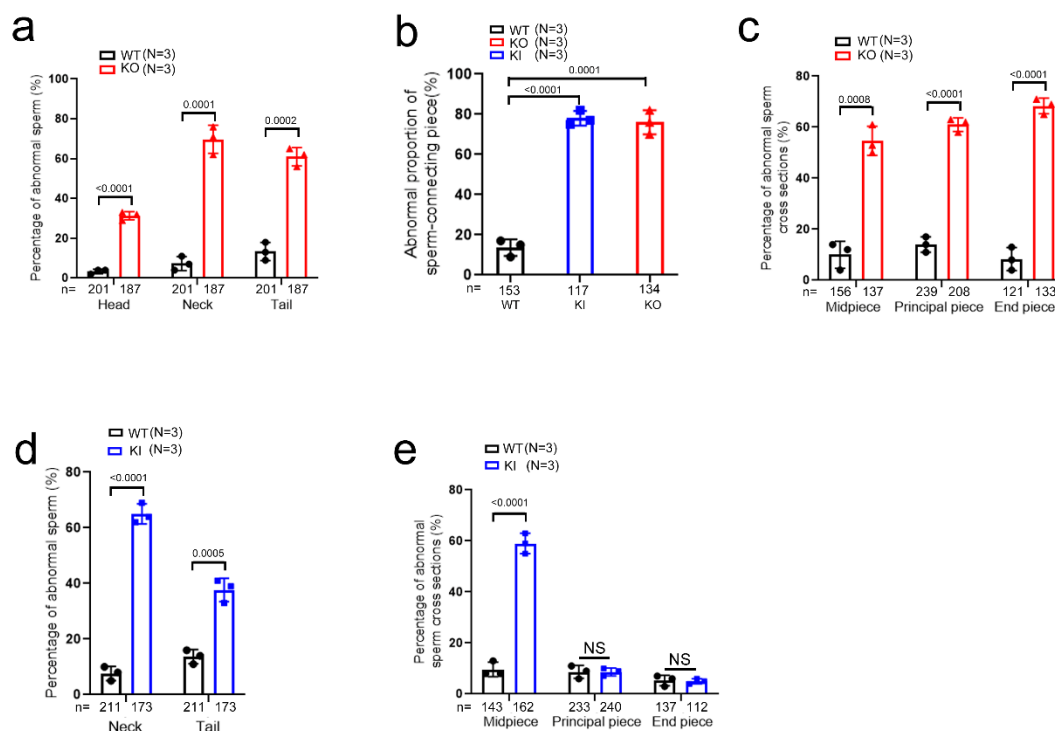

**Supplementary Fig. 4 Statistics describing abnormal phenotype of spermatozoa in male homozygous *Cep128* KO and KI mice.** **a** Numbers of morphologically defective spermatozoa in male *Cep128* KO mice. N, the number of mice analyzed. n, the number of sperm analyzed. (Two-sided student's *t* test; error bars, mean  $\pm$  SEM). The *p* values are indicated in the graphs. **b** Statistics on defects in ultrastructure of the sperm connecting piece in homozygous KO and KI mice. N, the number of mice analyzed. n, the number of cross sections analyzed. (Two-sided student's *t* test; error bars, mean  $\pm$  SEM). The *p* values are indicated in the graphs. **c** Significant abnormalities detected in sperm flagella of KO mice. N, the number of mice analyzed. n, the number of cross sections analyzed. (Two-sided student's *t* test; error bars, mean  $\pm$  SEM). The *p* values are indicated in the graphs. **d** Numbers of morphologically defective spermatozoa in

male homozygous KI mice. N, the number of mice analyzed. n, the number of sperm analyzed. (Two-sided student's *t* test; error bars, mean  $\pm$  SEM). The *p* values are indicated in the graphs. **e** Significantly disordered arrangements of MTDs 1–3 and ODFs 1–3 in the midpieces of homozygous KI mice. N, the number of mice analyzed. n, the number of cross sections analyzed. ODF, outer dense fibres; MTD, peripheral microtubule doublets. (Two-sided student's *t* test; NS, not significant; error bars, mean  $\pm$  SEM). The *p* values are indicated in the graphs. Source data are provided as a Source Data file.



## Supplementary Fig. 5

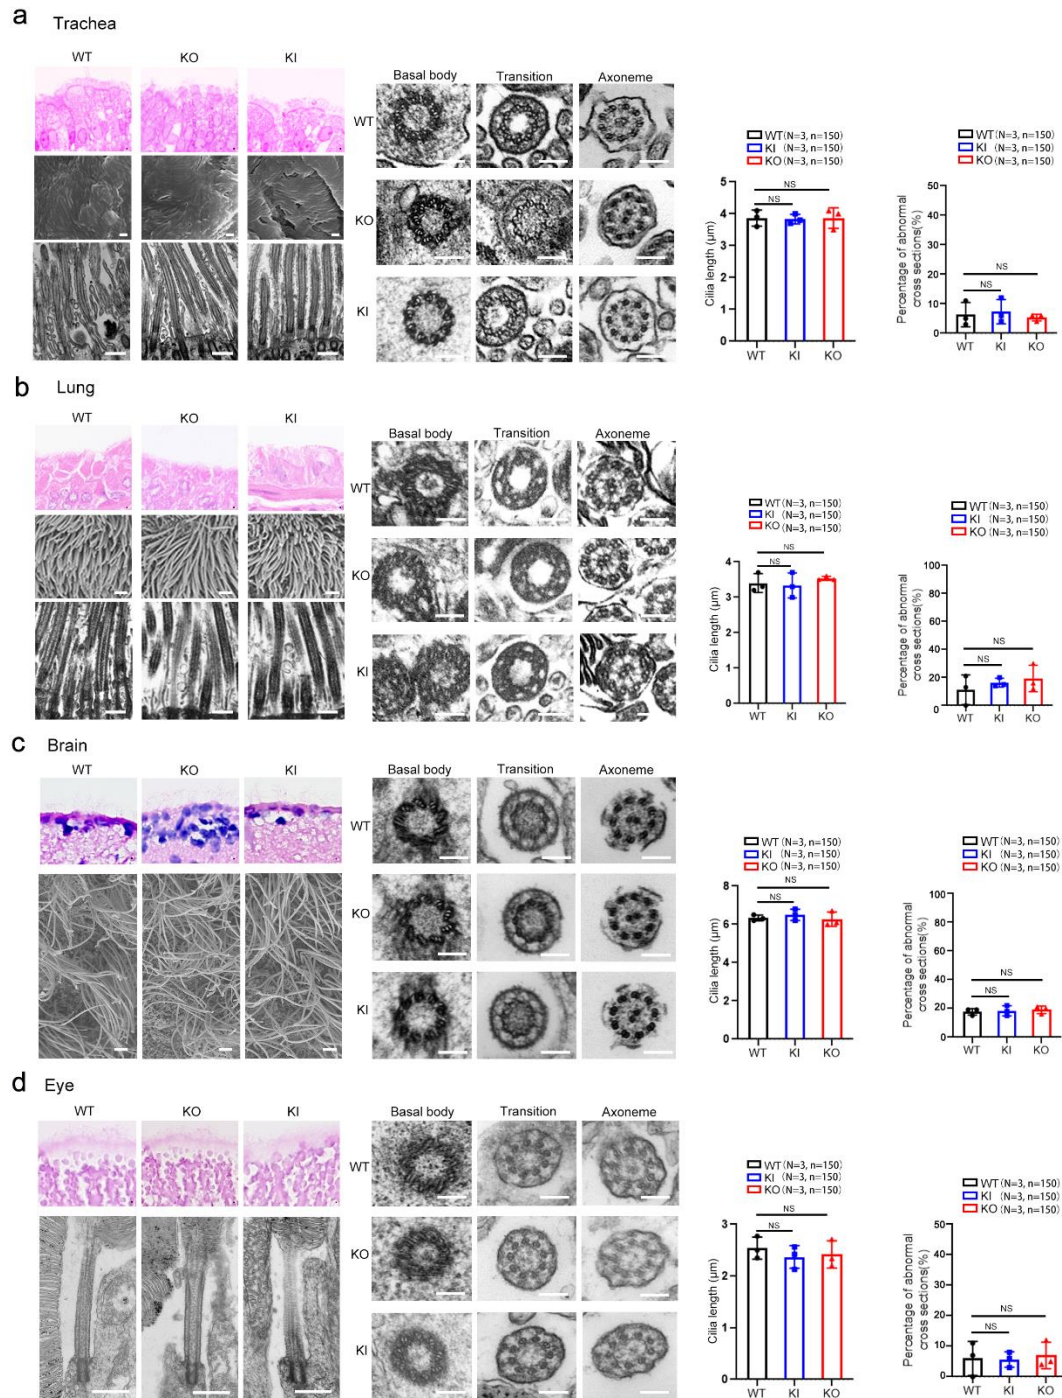

**Supplementary Fig. 5 homozygous *Cep128* KO and KI mice show normal ciliary development.** a-d Regular development of cilia in trachea (a), lung (b), eye (c), and brain (d) among WT, KO, and KI mice (scale bars, 500 nm/100 nm [TEM]). Data on ciliary length, and abnormal ultrastructure in WT, KO, and KI mice were not

statistically different. N, the number of mice analyzed. n, the number of cilia or cross section analyzed. (Two-sided student's *t* test; NS, not significant; error bars, mean  $\pm$  SEM). Source data are provided as a Source Data file.

## Supplementary Fig. 6

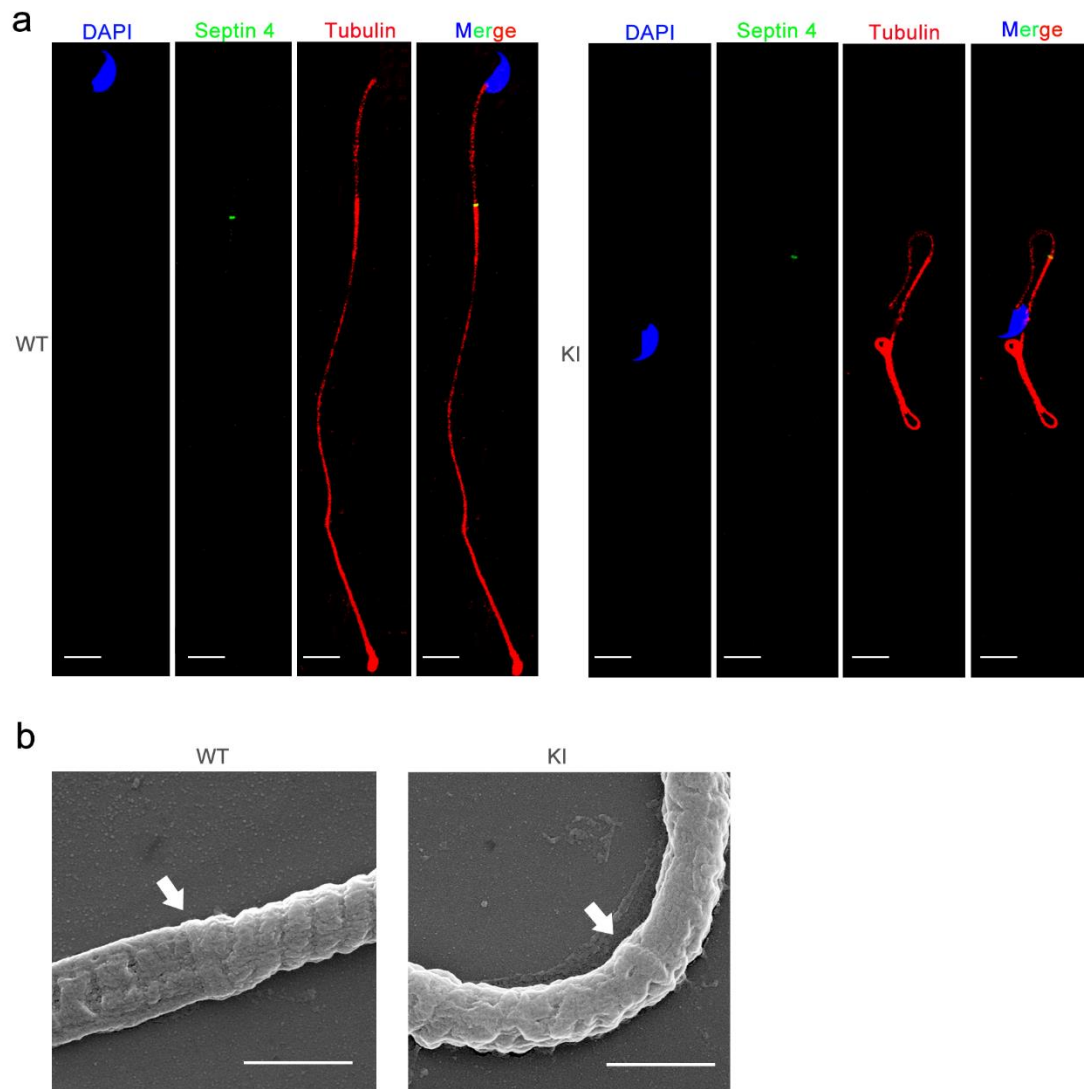

### Supplementary Fig. 6 The sperm annulus is normal in male homozygous *Cep128*

**KI mice.** **a** Expression of Septin 4 was visible in both WT and KI mice (n = 3 biologically independent WT mice or KI mice; green, Septin 4; red, Ac-Tubulin; blue, DAPI; scale bars, 5 μm). **b** SEM showed the intact annulus in sperm from male KI mice (n = 3 biologically independent WT mice or KI mice; scale bars, 1 μm).

## Supplementary Fig. 7

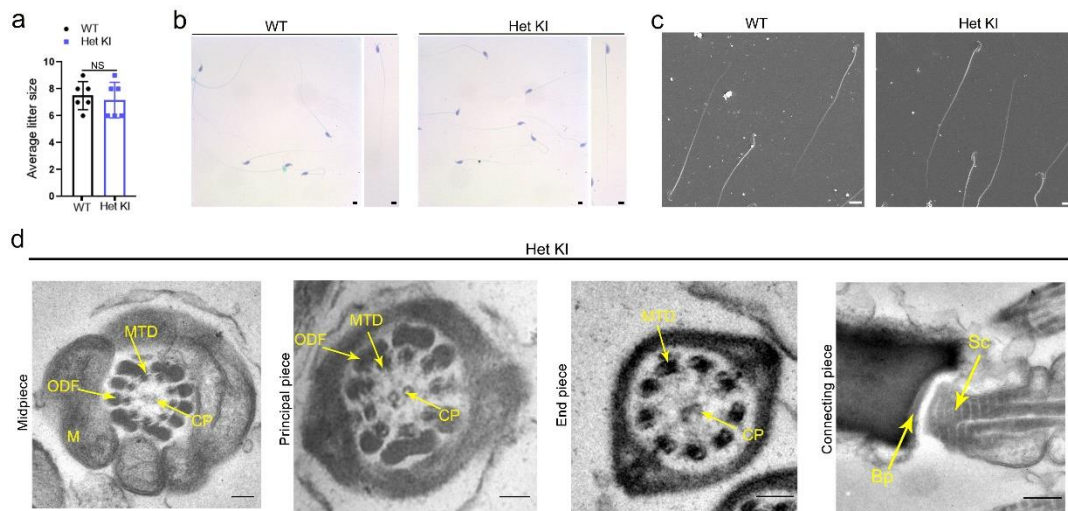

### Supplementary Fig. 7. Normal fertility observed in heterozygous KI male mice.

**a** Heterozygous KI male mice showed normal fertility ( $n = 6$  biologically independent WT mice or heterozygous KI mice; two-sided student's  $t$  test; NS, not significant; error bars, mean  $\pm$  SEM). **b** and **c** Papanicolaou staining (**b**) and SEM (**c**) showed the normal sperm morphology. ( $n = 3$  biologically independent WT mice or heterozygous KI mice; scale bars, 20  $\mu$ m). **d** Transmission electron microscopy (TEM) showed the regular "9+2" ultrastructure and sperm-connecting piece of sperm from heterozygous KI mice. Sc, segmented column; Bp, basal plate; CP, central-pair microtubules; ODF, outer dense fibres; MTD, peripheral microtubule doublets; M, mitochondria. ( $n = 3$  biologically independent WT mice or heterozygous KI mice; scale bars, 150 nm). Source data are provided as a Source Data file.

Supplementary Fig. 8

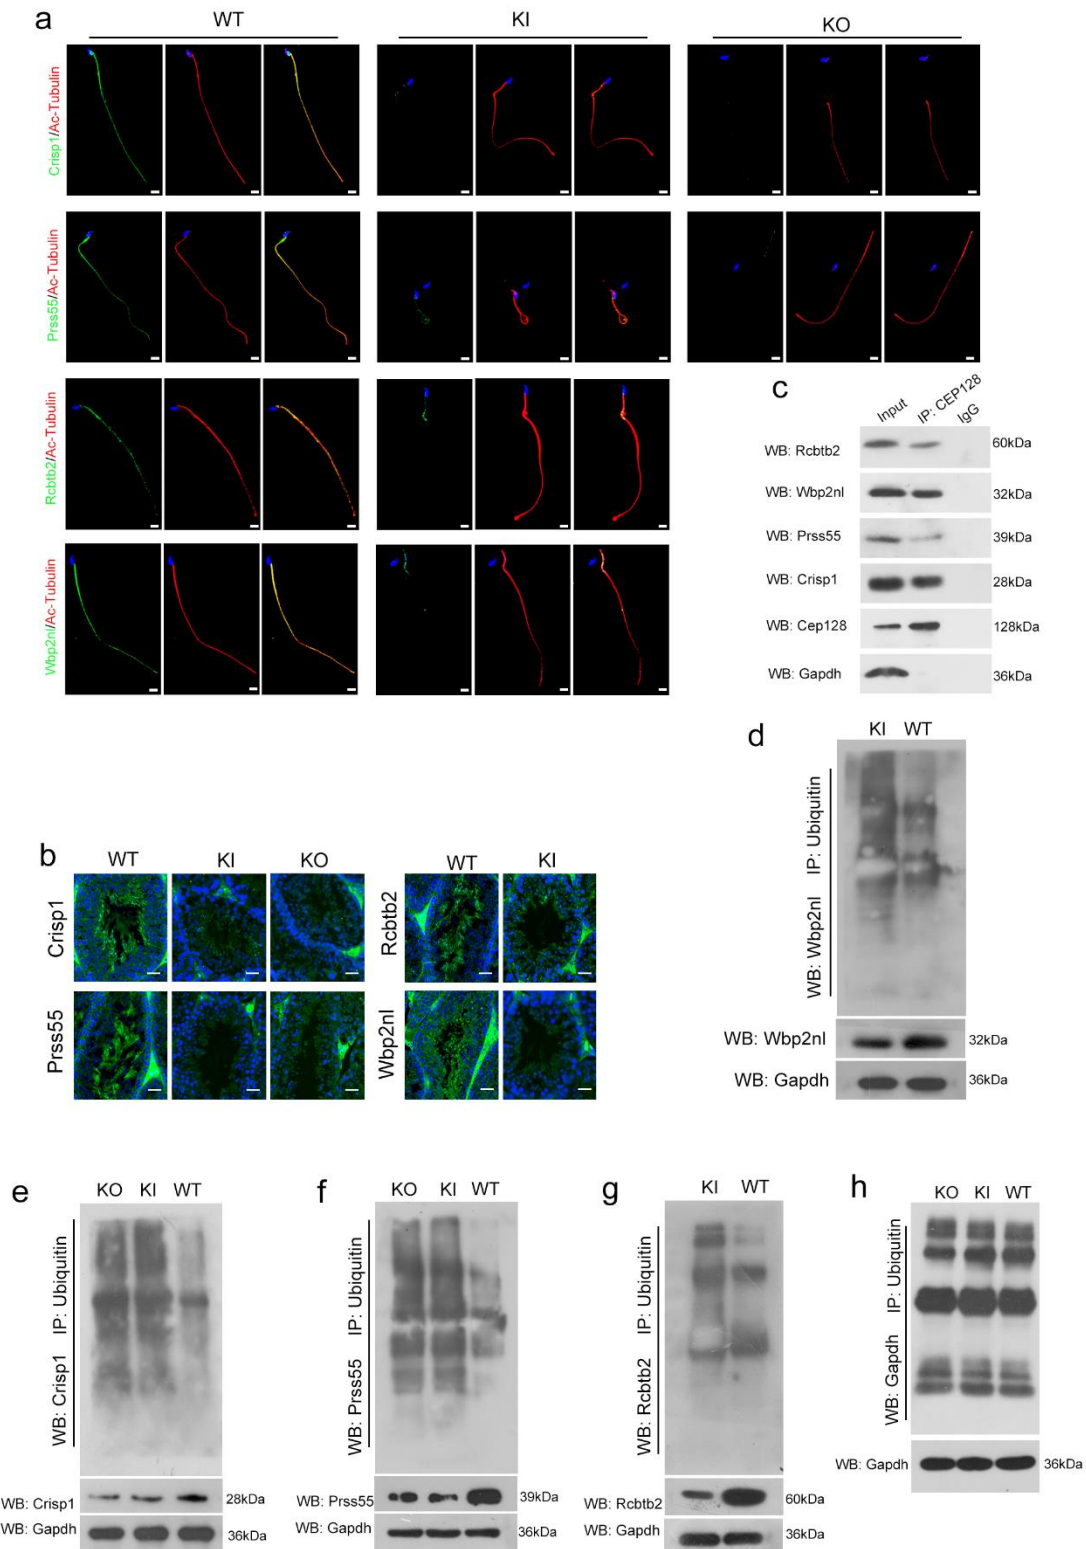

Supplementary Fig. 8 Proteins associated with male fertility are downregulated in male homozygous *Cep128* KO and KI mice. a Staining of Wbp2nl, Rcctb2, Prss55,

and Crisp1 was marginally detected in the sperm tails from male homozygous KO and/or homozygous KI mice. (n = 3 biologically independent WT mice, KI mice or KO mice; green, Wbp2nl/Rcbtb2/Prss55/Crisp1; red, Ac-Tubulin; blue, DAPI; scale bars, 5  $\mu$ m). **b** Decreased expression of key proteins in the testes of homozygous KO and/or homozygous KI male mice. (n = 3 biologically independent WT mice, KI mice or KO mice; green, Wbp2nl/Rcbtb2/Prss55/Crisp1; blue, DAPI; scale bars, 20  $\mu$ m). **c** Binding of CEP128 to Wbp2nl, Rcbtb2, Prss55, and Crisp1 in mouse testes was investigated by co-immunoprecipitation assay. Three independent experiments were performed. **d-h** Increased ubiquitination levels of Wbp2nl (d), Crisp1 (e), Prss55 (f), and Rcbtb2 (g) in homozygous KI and/or KO mice compared with WT mice. No significant difference in ubiquitination levels of Gapdh (h) in homozygous KI and/or KO mice compared with WT mice. The extracted proteins of KO, KI or WT testes were incubated with 3  $\mu$ g of anti-ubiquitin overnight at 4  $^{\circ}$ C, anti-RCBTB2 antibody, anti-WBP2NL antibody, anti-CRISP1 antibody, anti-PRSS55 antibody, and anti-GAPDH antibody were used for the immunoblot analysis. Three independent experiments were performed. (n = 3 biologically independent WT mice, KI mice or KO mice). Source data are provided as a Source Data file.

## Supplementary Fig. 9

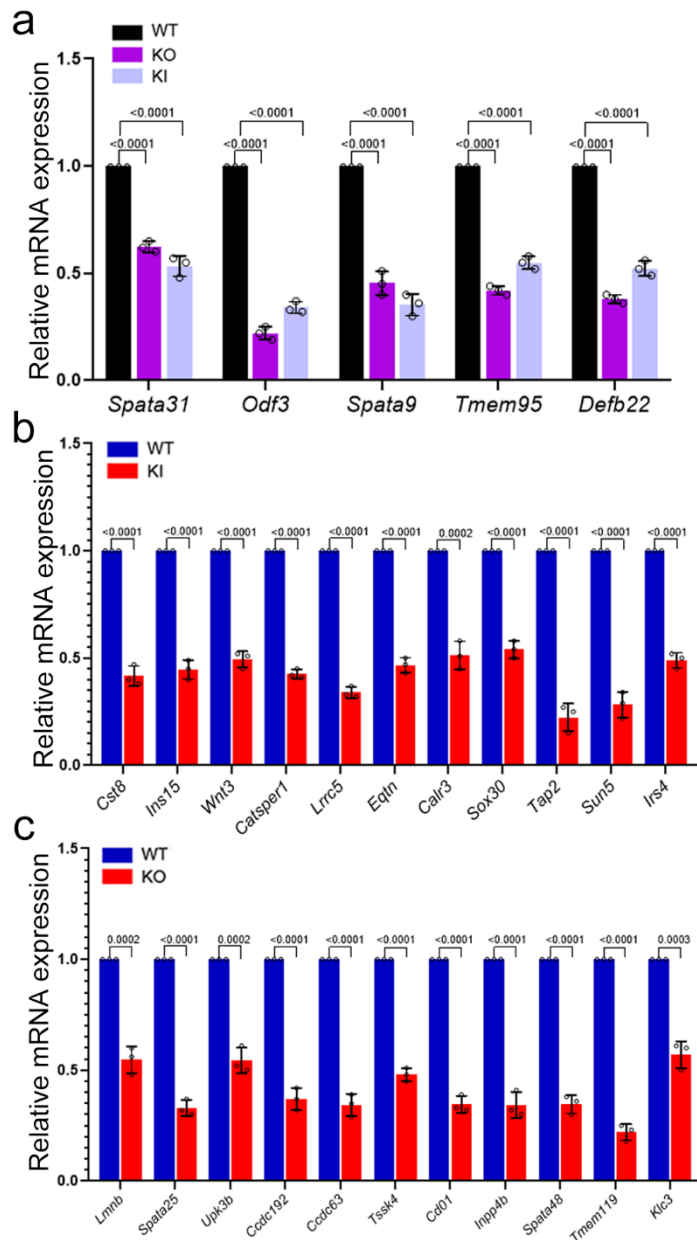

### Supplementary Fig. 9 Differentially expressed genes in male homozygous *Cep128*

**KO and KI mice. a-c** Diminution of key genes as determined by RNA-sequencing analysis was further validated by qPCR in both KO and KI mice (a), or only in KI (b) or KO mice (c). (n = 3 biologically independent WT mice, KO mice or KI mice; two-sided student's *t* test; error bars, mean ± SEM). The *p* values are indicated in the graphs.

Source data are provided as a Source Data file.

## Supplementary Fig. 10

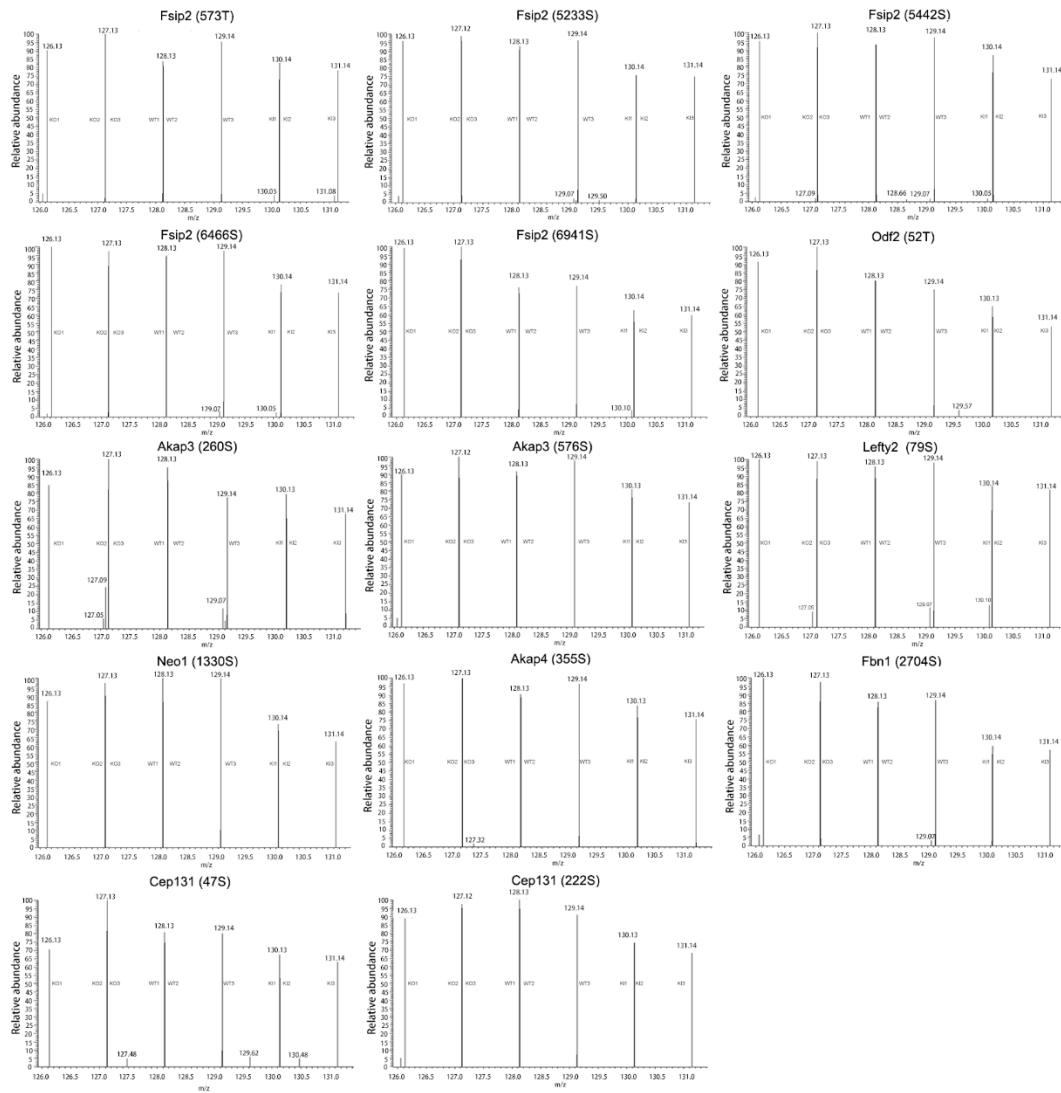

**Supplementary Fig. 10** Differential phosphorylated proteins in male homozygous *Cep128* KI mice. MS/MS spectra of differentially phosphorylated proteins involved in spermatogenesis in KI mice compared to WT mice. (n = 3 biologically independent WT mice or KI mice).



## Supplementary Fig. 11

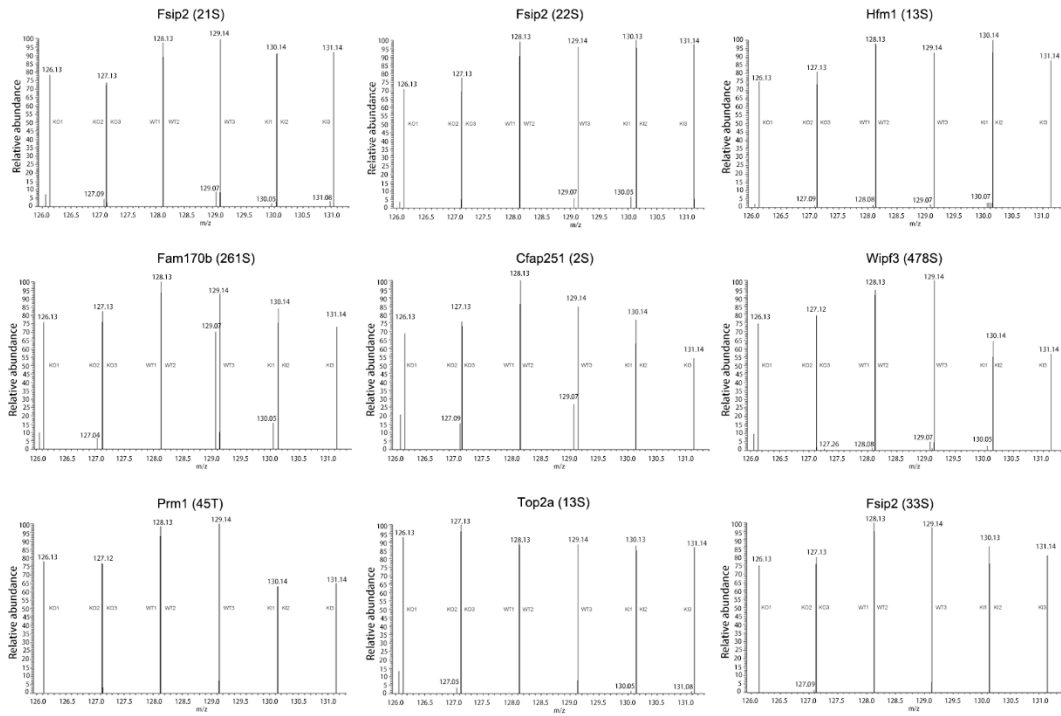

**Supplementary Fig. 11** Differential phosphorylated proteins in male *Cep128* KO mice. MS/MS spectra of differentially phosphorylated proteins involved in spermatogenesis in KO mice compared to WT mice. (n = 3 biologically independent WT mice or KO mice).

## Supplementary Tables

**Supplementary Table 1. The genetic analysis of *CEP128*<sup>R222Q</sup> variant**

|                        | The PAGE Study            | geomAD-Exomes               | ExAC               | 1000Genomes         | Other projects                          |
|------------------------|---------------------------|-----------------------------|--------------------|---------------------|-----------------------------------------|
| Frequency              | 0.00263 (Global)          | 0.000689 (Global)           | 0.000726 (Global)  | 0.0006 (Global)     | 8.3KJPN                                 |
|                        | 0.00025 (AfricanAmerican) | 0.000 (Europe)              | 0.000 (Europe)     | 0.000 (Europe)      | 0.02339 (Japanese)                      |
|                        | 0.000 (Mexican)           | 0.00345 (Asian)             | 0.00346 (Asian)    | 0.003 (East Asian)  | KRGDB                                   |
|                        | 0.02 (Asian)              | 0.00006 (American)          | 0.00009 (American) | 0.000 (American)    | 0.0113 (Korean)                         |
|                        | 0.000 (PuertoRican)       | 0.000 (African)             | 0.000 (African)    | 0.000 (African)     | A Vietnamese Genetic Variation Database |
|                        | 0.0073 (NativeHawaiian)   | 0.000 (Ashkenzai<br>Jewish) | 0.000 (Other)      | 0.000 (South Asian) | 0.008 (Global)                          |
|                        | 0.000 (Cuban)             |                             |                    |                     |                                         |
|                        | 0.000 (Dominican)         |                             |                    |                     |                                         |
|                        | 0.000 (CentralAmerican)   |                             |                    |                     |                                         |
|                        | 0.000 (SouthAmerican)     |                             |                    |                     |                                         |
| 0.000 (NativeAmerican) |                           |                             |                    |                     |                                         |
| 0.000 (SouthAsian)     |                           |                             |                    |                     |                                         |
| Function               | SIFT                      | PolyPhen-2                  | Mutation Taster    | CADD                |                                         |
| prediction             | Deleterious               | Possibly Damaging           | Polymorphism       | 23.3                |                                         |

NCBI reference sequence number of *CEP128* is GenBank: NM\_152446.5. Variants with CADD values greater than 4 are considered to be deleterious.

**Supplementary Table 2. Transcription factor binding sites predicted by the JASPAR database.**

| Model ID | Model name   | Score   | Relative score | Start          | End            | Strand | Predicted site sequence |
|----------|--------------|---------|----------------|----------------|----------------|--------|-------------------------|
| MA0113.1 | GR- $\beta$  | 8.78691 | 0.805386500183 | chr14:51187733 | chr14:51187750 | +      | AAGGAGTTTTTCGTCCTGT     |
| MA0095.1 | YY1          | 8.38313 | 0.99999988315  | chr9:123835374 | chr9:123835379 | +      | GCCATC                  |
| MA0466.1 | CEBP $\beta$ | 8.88441 | 0.913066988859 | chr1:243288486 | chr1:243288496 | +      | CGTTGCTTAAC             |

**Supplementary Table 3. Semen analysis using CASA in the heterozygous KI mice**

|                                                                | Adult Male Mice |            |
|----------------------------------------------------------------|-----------------|------------|
|                                                                | WT              | Het KI     |
| <b>Semen parameters</b>                                        |                 |            |
| Sperm concentration ( $10^6/\text{ml}$ ) <sup>a</sup>          | 29.83±3.31      | 37.20±6.51 |
| Motility (%)                                                   | 53.20±4.67      | 44.85±6.26 |
| Progressive motility (%)                                       | 56.78±9.51      | 49.50±3.71 |
| <b>Sperm locomotion parameters</b>                             |                 |            |
| Curvilinear velocity (VCL) ( $\mu\text{m/s}$ )                 | 60.05±6.11      | 59.19±4.57 |
| Straight-line velocity (VSL) ( $\mu\text{m/s}$ )               | 19.37±4.51      | 28.24±4.07 |
| Average path velocity (VAP) ( $\mu\text{m/s}$ )                | 27.56±4.58      | 36.97±1.11 |
| Amplitude of lateral head displacement (ALH) ( $\mu\text{m}$ ) | 1.01±0.45       | 0.61±0.33  |
| Linearity (LIN)                                                | 0.44±0.12       | 0.48±0.32  |
| Wobble (WOB, = VAP/VCL)                                        | 0.48±0.59       | 0.47±0.15  |
| Straightness (STR, = VSL/VAP)                                  | 0.96±0.55       | 0.76±0.65  |
| Beat-cross frequency (BCF) (Hz)                                | 7.01±0.37       | 3.80±0.37  |

<sup>a</sup>Epididymides and vas deferens

**Supplementary Table 4. Clinical features of the couples undergoing intracytoplasmic sperm injection (ICSI) treatment.**

| Subject                                   |                                             | IV-3's wife | IV-2's wife |
|-------------------------------------------|---------------------------------------------|-------------|-------------|
| Age (y)                                   |                                             | 25-35       | 25-35       |
| Length of primary infertility history (y) |                                             | ≥5          | ≥5          |
| BMI                                       |                                             | 18-24       | 18-24       |
| Basal hormones                            | FSH (IU/L)                                  | 2.0         | 6.1         |
|                                           | LH (IU/L)                                   | 0.8         | 6.9         |
|                                           | E2 (pg/mL)                                  | 12.4        | 61.3        |
|                                           | Prog (ng/ml)                                | 0.66        | 0.53        |
| Cycle 1                                   | Protocol                                    | Long        | Long        |
|                                           | E2 level on the trigger day (pg/mL)         | 2028        | 1307        |
|                                           | No. of follicles ≥ 14 mm on the trigger day | 5           | 5           |
|                                           | No. of follicles ≥18 mm on the trigger day  | 1           | 4           |
|                                           | No. of oocytes retrieved                    | 8           | 9           |
| ICSI progress                             | Oocytes injected                            | 4           | 7           |
|                                           | Fertilization rate (%)                      | 50% (2/4)   | 14.3% (1/7) |
|                                           | Cleavage rate (%)                           | 50% (1/2)   | 100% (1/1)  |
|                                           | 6 cell formation rate (%)                   | 0           | 0           |
|                                           | 8 cell formation rate (%)                   | 0           | 0           |
|                                           | Blastocyst formation rate (%)               | 0           | 0           |

**Supplementary Table 5. Primers used for generation of animal models**

| <b>Target</b>                         | <b>Primer sequences (5'—3')</b>                                                                                                                                   |
|---------------------------------------|-------------------------------------------------------------------------------------------------------------------------------------------------------------------|
| CAS9-F                                | TAATACGACTCACTATAGGGAGATTTTCAGGTTGGACCGGTG                                                                                                                        |
| CAS9-R                                | GACGTCAGCGTTCGAATTGC                                                                                                                                              |
| Sg <i>Cep128</i> -F                   | TAATACGACTCACTATAGGGTTTCAGATCGAGTGGAGCGGGT<br>TTTAGAGCTAGAAATAGC                                                                                                  |
| sgRNA-IVT-R                           | AAAAGCACCGACTCGGTGCCAC                                                                                                                                            |
| <i>Cep128</i> donor<br>template oligo | CCCCAGCTGATCATGACGTCTTTCCACCAGCTCTCTTTCTAAG<br>CGCATCTCTCGTTCTATTTCTGCAGCCGCTGCTCCACTCGAT<br>CTGAAACCTCAAGATGAACAGAGAACAAGTAGCATTAGGGA<br>GCTAGCAGGGAGGTGGGGACCGC |
| Cep128-cha-IF                         | TAGCTCCCTAATGCTACTTGTTT                                                                                                                                           |
| Cep128-cha-IR                         | CAGTTTGCACGGTGTCTGC                                                                                                                                               |

**Supplementary Table 6. The qPCR primers used in the present study**

| <b>Target</b>   | <b>Forward primer (5'—3')</b> | <b>Reverse primer (5'—3')</b> | <b>Product (bp)</b> |
|-----------------|-------------------------------|-------------------------------|---------------------|
| <i>Cst8</i>     | TGGCAGTTGGTGTGGATCAG          | TGGTATTCCATTCGGTCTGTG         | 202                 |
| <i>Wnt3</i>     | CGCTTCTGCCGCAATTACAT          | GTGACTGCGAAGGCGACAC           | 215                 |
| <i>Lrrc52</i>   | TATTCCTCTGAACACCCGGAGA        | GGAGCTGAGGTCAAGGTAGATG        | 181                 |
| <i>Eqtn</i>     | CAGCAACTCTTATTGGGTCCAC        | CTCAACGATGAGCTCCTTACC         | 190                 |
| <i>Calr3</i>    | CATTGCTCTGGGCCATCTGT          | GGTAGTCTGCAGGCCTTTGT          | 191                 |
| <i>Sox30</i>    | GAGACTATCCAGATGAGCACACA       | CAAGGCTCCAATGTCCAGAGT         | 140                 |
| <i>Tnp2</i>     | CCTCAAAGTCACACCAGTAACCA       | TTCTGTTCTTGGGGCAGCTC          | 197                 |
| <i>Sun5</i>     | CCGGACGAGGAACATCGGG           | GGCAACAGAAGGGGGTCATTC         | 144                 |
| <i>Irs4</i>     | GGACAGAGTGACCACAGTGAG         | AAGGCTTTCAGATGACCCTT          | 169                 |
| <i>Catsper1</i> | TGCAGCATTGCGTGAGTTC           | CGGGTCAATACGAGGTCCAC          | 182                 |
| <i>Lmnb2</i>    | GCTGCAGAGAACCACATCCA          | CAGGGCCAGCTTAATGTCCA          | 165                 |
| <i>Spata25</i>  | TTCTTCGGGTTTCGTCCCTTG         | TTTCTCCGAGGAGTCTCCCA          | 189                 |
| <i>Upk3b</i>    | AGACCTGATTGCCTACGTGC          | GGTGCCTTAGTTGAGACATGCT        | 187                 |
| <i>Spata31</i>  | TCTGGCAAGAATCTGGGACC          | GGATGTTAAATTGTTTTCCATCTCG     | 219                 |
| <i>Ccdc192</i>  | TGTTTCGGCTACACTGGCTG          | AAGGTGTCTTCGAGCTGAGTG         | 171                 |
| <i>Ccdc63</i>   | ACTGAGAAAGACCACGCAGG          | TGCTGCAGATTGATGTCCGT          | 180                 |
| <i>Tssk4</i>    | TGCTAGGCTTGCCCTACAAC          | TAGCAGCTGGAGGATCAGGT          | 197                 |
| <i>Cdo1</i>     | CATGATCACACGGACTCCCA          | CAACGAAGGAATCAAGACGGT         | 171                 |
| <i>Cep128</i>   | GATGCTGAAGGCAGAAAGC           | CTCCTTCTTGTCTAGTTCCTCC        | 178                 |

|                |                       |                       |     |
|----------------|-----------------------|-----------------------|-----|
| <i>Inpp4b</i>  | AGACGAGCATCAACTGCACA  | TGACAAGAAGCAAGGCGACA  | 167 |
| <i>Spata48</i> | ATCCACCTTCAGTCTTGCCG  | GGTTTGGTATGGCTCTGCCT  | 180 |
| <i>Tmem119</i> | GAAGAAGGCCTGGACACCTC  | CCTCTCCTCCTCCTCCTCC   | 145 |
| <i>Odf3</i>    | ACCAAGTTCAAGGCTCCACAG | TGCCAAAGGTGACAGTAGGA  | 142 |
| <i>Spata9</i>  | CCTGCACAGCGTACAGATGA  | TTTGCCAGCACCGCATTAAC  | 141 |
| <i>Tmem95</i>  | CCCCAGATTTCTCGGCCTTT  | GTA CTGGGGGATCCTGGTCT | 155 |
| <i>Insl5</i>   | AGACTGTGAAGCTCTGTGGC  | CCTGTCTAGGAGCTGGAGGT  | 140 |
| <i>Klc3</i>    | AATCCATCAGGCGAGGAAGC  | GTTGAGAGCTGGGAGAGCTG  | 151 |
| <i>Defb22</i>  | CTGGCCCATTGGTCACAG    | CTCGTTGCAGGTTCCGTCT   | 110 |
| <i>Gapdh</i>   | GGTGAAGGTCGGTGTGAACG  | CTCGCTCCTGGAAGATGGTG  | 233 |

---
